# Supplementary material for: Limited Stress Response to Transplantation in the Mediterranean Macroalga Ericaria amentacea, a Key Species for Marine Forest Restoration
Source: MDPI journal article supplement (doi:10.3390/ijerph191912253), 2022-09-27
Supplement: s1 [file s1]

Table S1: Results of PERMANOVA (a) main test and (b) pairwise tests testing for differences in concentration of Total Phenolic Compounds (TPC) in *Ericaria amentacea* for the factors Treatment (Natural and Transplanted), Time (T0, T1, T2, T3 and T4) and Site (Barcarello and Capo Gallo). Significant p values are highlighted in bold.

| Total Phenolic Compounds (TPC) |            |              |            |              |
|--------------------------------|------------|--------------|------------|--------------|
| <b>a) Main Test</b>            |            |              |            |              |
| Source of variation            | df         | MS           | Pseudo-F   | P(perm)      |
| Treatment (Tr)                 | 1          | 27.23        | 133.62     | <b>0.053</b> |
| Time (Ti)                      | 4          | 48.34        | 2.41       | 0.255        |
| Site (Si)                      | 1          | 64.59        | 22.42      | <b>0.001</b> |
| Tr x Ti                        | 3          | 0.54         | 0.65       | 0.626        |
| Tr x Si                        | 1          | 0.20         | 0.07       | 0.777        |
| Ti x Si                        | 3          | 19.32        | 6.71       | <b>0.001</b> |
| Tr x Ti x Si                   | 2          | 0.83         | 0.29       | 0.772        |
| Residuals                      | 64         | 2.88         |            |              |
| <b>b) Pair-wise tests</b>      |            |              |            |              |
| (between Times within Sites)   |            |              |            |              |
| Times                          | Barcarello |              | Capo Gallo |              |
|                                | t          | P(perm)      | t          | P(perm)      |
| T0, T1                         | 1.51       | 0.131        | 2.15       | <b>0.060</b> |
| T0, T2                         | 0.98       | 0.343        | 4.13       | <b>0.002</b> |
| T0, T3                         | 1.39       | 0.181        | 9.94       | <b>0.001</b> |
| T0, T4                         | 5.33       | <b>0.001</b> | -          |              |
| T1, T2                         | 0.73       | 0.474        | 3.07       | <b>0.007</b> |
| T1, T3                         | 1.05       | 0.338        | 6.47       | <b>0.001</b> |
| T1, T4                         | 5.85       | <b>0.001</b> | -          |              |
| T2, T3                         | 0.20       | 0.841        | 3.49       | <b>0.003</b> |
| T2, T4                         | 5.37       | <b>0.001</b> | -          |              |
| T3, T4                         | 7.78       | <b>0.001</b> | -          |              |

Table S2: Results of PERMANOVA (a) main test and (b) pairwise tests testing for differences in concentration of Total Lipids (TL) in *Ericaria amentacea* for the factors Treatment (Natural and Transplanted), Time (T0, T1, T2, T3 and T4) and Site (Barcarello and Capo Gallo). Significant p values are highlighted in bold.

| Total Lipids (TL)         |                                   |              |            |              |
|---------------------------|-----------------------------------|--------------|------------|--------------|
| <b>a) Main Test</b>       |                                   |              |            |              |
| Source of variation       | df                                | MS           | Pseudo-F   | P(perm)      |
| Treatment (Tr)            | 1                                 | 321.55       | 2.78       | 0.287        |
| Time (Ti)                 | 4                                 | 95.12        | 1.43       | 0.466        |
| Site (Si)                 | 1                                 | 10.36        | 0.37       | 0.553        |
| Tr x Ti                   | 3                                 | 6.07         | 4.99       | 0.285        |
| Tr x Si                   | 1                                 | 118.27       | 4.27       | <b>0.046</b> |
| Ti x Si                   | 2                                 | 62.02        | 2.24       | 0.112        |
| Tr x Ti x Si              | 1                                 | 0.44         | 0.02       | 0.899        |
| Residuals                 | 55                                | 27.68        |            |              |
| <b>b) Pair-wise tests</b> |                                   |              |            |              |
|                           | (between Treatments within Sites) |              |            |              |
|                           | Barcarello                        |              | Capo Gallo |              |
| Treatments                | t                                 | P(perm)      | t          | P(perm)      |
| NAT, TRANSP               | 2.06                              | <b>0.045</b> | 3.08       | <b>0.006</b> |

Table S3: Results of PERMANOVA (a) main test and (b) pairwise tests testing for differences in Fatty Acid (FA) profiles in *Ericaria amentacea* for the factors Treatment (Natural and Transplanted), Time (T0, T1, T2, T3 and T4) and Site (Barcarello and Capo Gallo). Significant p values are highlighted in bold.

| Fatty acids (FA)                                                      |         |              |              |              |
|-----------------------------------------------------------------------|---------|--------------|--------------|--------------|
| <b>a) Main Test</b>                                                   |         |              |              |              |
| Source of variation                                                   | df      | MS           | Pseudo-F     | P(perm)      |
| Treatment (Tr)                                                        | 1       | 9.9E-03      | 5.05         | <b>0.023</b> |
| Time (Ti)                                                             | 4       | 4.3E-02      | 16.18        | <b>0.003</b> |
| Site (Si)                                                             | 1       | 1.1E-02      | 12.57        | <b>0.001</b> |
| Tr x Ti                                                               | 3       | 4.2E-03      | 1.45         | 0.390        |
| Tr x Si                                                               | 1       | 2.0E-03      | 2.22         | 0.061        |
| Ti x Si                                                               | 2       | 2.4E-03      | 2.63         | <b>0.014</b> |
| Tr x Ti x Si                                                          | 1       | 3.0E-03      | 3.31         | <b>0.016</b> |
| Residuals                                                             | 54      | 9.0E-04      |              |              |
| <b>b) Pair-wise tests (between Times within Sites and Treatments)</b> |         |              |              |              |
| <b>Site: Barcarello</b>                                               |         |              |              |              |
| Times                                                                 | Natural |              | Transplanted |              |
|                                                                       | t       | P(perm)      | t            | P(perm)      |
| T0, T1                                                                | 4.98    | <b>0.009</b> | 3.96         | <b>0.005</b> |
| T0, T2                                                                | 2.54    | <b>0.005</b> | 2.81         | <b>0.006</b> |
| T0, T3                                                                | 3.58    | <b>0.010</b> | 4.18         | <b>0.009</b> |
| T0, T4                                                                | 4.14    | <b>0.007</b> | 4.18         | <b>0.012</b> |
| T1, T2                                                                | 5.25    | <b>0.006</b> | 4.04         | <b>0.008</b> |
| T1, T3                                                                | 6.43    | <b>0.014</b> | 7.83         | <b>0.007</b> |
| T1, T4                                                                | 8.05    | <b>0.010</b> | 7.78         | <b>0.005</b> |
| T2, T3                                                                | 2.17    | <b>0.011</b> | 5.22         | <b>0.013</b> |
| T2, T4                                                                | 3.60    | <b>0.012</b> | 6.14         | <b>0.006</b> |
| T3, T4                                                                | 2.94    | <b>0.015</b> | 4.71         | <b>0.006</b> |
| <b>Site: Capo Gallo</b>                                               |         |              |              |              |
| Times                                                                 | Natural |              | Transplanted |              |
|                                                                       | t       | P(perm)      | t            | P(perm)      |
| T0, T1                                                                | 3.82    | <b>0.006</b> | 2.31         | <b>0.024</b> |
| T0, T2                                                                | 1.64    | 0.089        | 2.98         | <b>0.008</b> |
| T1, T2                                                                | 4.01    | <b>0.007</b> | 4.23         | <b>0.007</b> |
| <b>c) Pair-wise tests (between Treatments within Sites and Times)</b> |         |              |              |              |
| <b>Site: Barcarello</b>                                               |         |              |              |              |
| Treatments                                                            | Times   | t            | P(perm)      |              |
| NAT, TRANSP                                                           | T1      | 1.50         | 0.101        |              |
|                                                                       | T2      | 1.19         | 0.244        |              |
|                                                                       | T3      | 3.31         | <b>0.013</b> |              |
|                                                                       | T4      | 2.60         | <b>0.020</b> |              |
| <b>Site: Capo Gallo</b>                                               |         |              |              |              |
| Treatments                                                            | Times   | t            | P(perm)      |              |
| NAT, TRANSP                                                           | T1      | 2.65         | <b>0.008</b> |              |
| NAT, TRANSP                                                           | T2      | 2.52         | <b>0.008</b> |              |

Table S4: Results of PERMANOVA (a) main test and (b) pairwise tests testing for differences in relative abundance of Fatty Acid (FA) classes in *Ericaria amentacea* for the factors Treatment (Natural and Transplanted), Time (T0, T1, T2, T3 and T4) and Site (Barcarello and Capo Gallo). Significant p values are highlighted in bold.

| Fatty acid (FA) classes |    |                       |          |              |                               |          |              |                                |          |              |
|-------------------------|----|-----------------------|----------|--------------|-------------------------------|----------|--------------|--------------------------------|----------|--------------|
| a) Main Test            |    | i) Saturated FA (SFA) |          |              | ii) Monounsaturated FA (MUFA) |          |              | iii) Polyunsaturated FA (PUFA) |          |              |
| Source of variation     | df | MS                    | Pseudo-F | P(perm)      | MS                            | Pseudo-F | P(perm)      | MS                             | Pseudo-F | P(perm)      |
| Treatment (Tr)          | 1  | 4.2E-03               | 3.46     | 0.244        | 9.8E-04                       | 2.32     | 0.315        | 1.0E-02                        | 2.58     | 0.291        |
| Time (Ti)               | 4  | 9.6E-03               | 12.07    | 0.081        | 1.5E-02                       | 9.76     | 0.097        | 5.4E-02                        | 14.48    | 0.072        |
| Site (Si)               | 1  | 4.7E-03               | 26.51    | <b>0.001</b> | 1.1E-03                       | 3.66     | 0.064        | 1.4E-02                        | 18.13    | 0.001        |
| Tr x Ti                 | 3  | 1.9E-03               | 4.48     | 0.293        | 5.0E-04                       | 0.31     | 0.800        | 1.3E-03                        | 0.29     | 0.855        |
| Tr x Si                 | 1  | 1.2E-03               | 6.93     | <b>0.010</b> | 4.3E-04                       | 1.43     | 0.221        | 4.2E-03                        | 5.50     | <b>0.019</b> |
| Ti x Si                 | 2  | 7.1E-04               | 3.97     | <b>0.033</b> | 1.3E-03                       | 4.51     | <b>0.012</b> | 3.3E-03                        | 4.38     | <b>0.014</b> |
| Tr x Ti x Si            | 1  | 4.4E-04               | 2.44     | 0.132        | 1.7E-03                       | 5.56     | <b>0.022</b> | 4.6E-03                        | 6.07     | <b>0.010</b> |
| Residuals               | 54 | 1.8E-04               |          |              | 3.0E-04                       |          |              | 7.6E-04                        |          |              |

  

|                     |    | iv) $\omega$ -3 PUFA |          |              | v) $\omega$ -6 PUFA |          |              | vi) Bacterial FA (BAFA) |          |              |
|---------------------|----|----------------------|----------|--------------|---------------------|----------|--------------|-------------------------|----------|--------------|
| Source of variation | df | MS                   | Pseudo-F | P(perm)      | MS                  | Pseudo-F | P(perm)      | MS                      | Pseudo-F | P(perm)      |
| Treatment (Tr)      | 1  | 1.6E-02              | 4.58     | 0.188        | 1.2E-03             | 105.98   | <b>0.004</b> | 2.0E-05                 | 3.58     | 0.260        |
| Time (Ti)           | 4  | 5.8E-02              | 28.19    | <b>0.044</b> | 8.5E-03             | 14.70    | <b>0.046</b> | 2.6E-04                 | 71.44    | <b>0.015</b> |
| Site (Si)           | 1  | 1.4E-02              | 22.80    | <b>0.001</b> | 2.6E-04             | 1.23     | 0.278        | 3.1E-06                 | 0.48     | 0.497        |
| Tr x Ti             | 3  | 1.6E-03              | 0.82     | 0.636        | 3.5E-04             | 1.47     | 0.544        | 9.7E-06                 | 3.68     | 0.327        |
| Tr x Si             | 1  | 3.7E-03              | 5.84     | <b>0.018</b> | 5.3E-06             | 0.02     | 0.869        | 5.7E-06                 | 0.88     | 0.403        |
| Ti x Si             | 2  | 1.8E-03              | 2.91     | <b>0.040</b> | 5.2E-04             | 2.45     | 0.087        | 3.2E-06                 | 0.51     | 0.642        |
| Tr x Ti x Si        | 1  | 2.0E-03              | 3.24     | 0.079        | 2.4E-04             | 1.13     | 0.284        | 2.5E-06                 | 0.39     | 0.575        |
| Residuals           | 54 | 6.3E-04              |          |              | 2.1E-04             |          |              | 6.4E-06                 |          |              |

  

| b) Pair-wise tests              |            |              |            |              |                  |              |            |              |  |
|---------------------------------|------------|--------------|------------|--------------|------------------|--------------|------------|--------------|--|
| Between Treatments within Sites | SFA        |              |            |              | $\omega$ -3 PUFA |              |            |              |  |
|                                 | Barcarello |              | Capo Gallo |              | Barcarello       |              | Capo Gallo |              |  |
| Treatments                      | t          | P(perm)      | t          | P(perm)      | t                | P(perm)      | t          | P(perm)      |  |
| NAT, TRANSP                     | 2.28       | <b>0.031</b> | 4.45       | <b>0.001</b> | 2.95             | <b>0.006</b> | 3.71       | <b>0.004</b> |  |
| Between Times within Sites      |            |              |            |              |                  |              |            |              |  |
|                                 | Barcarello |              | Capo Gallo |              | Barcarello       |              | Capo Gallo |              |  |
| Times                           | t          | P(perm)      | t          | P(perm)      | t                | P(perm)      | t          | P(perm)      |  |
| T0, T1                          | 6.59       | <b>0.002</b> | 2.24       | <b>0.045</b> | 8.66             | <b>0.001</b> | 4.83       | <b>0.003</b> |  |
| T0, T2                          | 1.75       | 0.119        | 0.81       | 0.457        | 2.19             | 0.057        | 1.09       | 0.296        |  |
| T0, T3                          | 0.13       | 0.891        | -          | -            | 2.15             | 0.073        | -          | -            |  |

|        |       |              |      |              |       |              |      |              |
|--------|-------|--------------|------|--------------|-------|--------------|------|--------------|
| T0, T4 | 1.91  | 0.079        | -    |              | 2.23  | <b>0.047</b> | -    |              |
| T1, T2 | 9.54  | <b>0.001</b> | 8.13 | <b>0.001</b> | 10.57 | <b>0.001</b> | 8.09 | <b>0.001</b> |
| T1, T3 | 15.62 | <b>0.001</b> | -    |              | 15.31 | <b>0.001</b> | -    |              |
| T1, T4 | 10.60 | <b>0.001</b> | -    |              | 20.25 | <b>0.001</b> | -    |              |
| T2, T3 | 7.43  | <b>0.001</b> | -    |              | 4.60  | <b>0.003</b> | -    |              |
| T2, T4 | 4.06  | <b>0.002</b> | -    |              | 10.80 | <b>0.001</b> | -    |              |
| T3, T4 | 1.62  | 0.113        | -    |              | 6.97  | <b>0.001</b> | -    |              |

| Between Times within Sites and Treatments |  | MUFA    |              |              |              | PUFA    |              |              |              |
|-------------------------------------------|--|---------|--------------|--------------|--------------|---------|--------------|--------------|--------------|
|                                           |  | Natural |              | Transplanted |              | Natural |              | Transplanted |              |
| Site: Barcarello                          |  | t       | P(perm)      | t            | P(perm)      | t       | P(perm)      | t            | P(perm)      |
| T0, T1                                    |  | 1.52    | 0.171        | 0.78         | 0.425        | 3.40    | 0.010        | 2.54         | 0.074        |
| T0, T2                                    |  | 1.82    | 0.116        | 0.68         | 0.461        | 0.91    | 0.403        | 0.15         | 0.853        |
| T0, T3                                    |  | 2.12    | 0.093        | 1.99         | 0.094        | 1.64    | 0.205        | 3.29         | <b>0.021</b> |
| T0, T4                                    |  | 4.12    | <b>0.006</b> | 5.15         | <b>0.008</b> | 4.08    | <b>0.012</b> | 3.48         | <b>0.027</b> |
| T1, T2                                    |  | 7.73    | <b>0.012</b> | 2.56         | <b>0.047</b> | 9.51    | <b>0.009</b> | 5.06         | <b>0.009</b> |
| T1, T3                                    |  | 9.36    | <b>0.021</b> | 4.27         | <b>0.008</b> | 12.66   | <b>0.008</b> | 10.98        | <b>0.007</b> |
| T1, T4                                    |  | 9.38    | <b>0.009</b> | 8.63         | <b>0.011</b> | 16.27   | <b>0.014</b> | 9.04         | <b>0.010</b> |
| T2, T3                                    |  | 0.53    | 0.563        | 2.93         | <b>0.024</b> | 1.79    | 0.116        | 7.30         | <b>0.010</b> |
| T2, T4                                    |  | 3.85    | <b>0.018</b> | 9.24         | <b>0.006</b> | 7.00    | <b>0.006</b> | 6.14         | <b>0.007</b> |
| T3, T4                                    |  | 3.62    | <b>0.012</b> | 5.83         | <b>0.010</b> | 6.28    | <b>0.006</b> | 1.48         | 0.162        |
| Site: Capo Gallo                          |  | t       | P(perm)      | t            | P(perm)      | t       | P(perm)      | t            | P(perm)      |
| T0, T1                                    |  | 0.44    | 0.710        | 0.01         | 1.000        | 1.31    | 0.269        | 0.09         | 0.877        |
| T0, T2                                    |  | 0.02    | 0.994        | 2.59         | 0.055        | 0.66    | 0.560        | 4.81         | <b>0.010</b> |
| T1, T2                                    |  | 0.40    | 0.684        | 1.95         | 0.081        | 2.67    | <b>0.027</b> | 5.25         | <b>0.007</b> |

| Between Treatments within Sites and Times |    | Barcarello |              | Capo Gallo |         | Barcarello |              | Capo Gallo |              |
|-------------------------------------------|----|------------|--------------|------------|---------|------------|--------------|------------|--------------|
|                                           |    | t          | P(perm)      | t          | P(perm) | t          | P(perm)      | t          | P(perm)      |
| NAT, TRANSP                               | T1 | 1.06       | 0.299        | 0.27       | 0.860   | 1.31       | 0.235        | 1.26       | 0.260        |
| NAT, TRANSP                               | T2 | 2.66       | <b>0.024</b> | 2.45       | 0.078   | 1.69       | 0.120        | 5.04       | <b>0.006</b> |
| NAT, TRANSP                               | T3 | 0.14       | 0.841        | -          |         | 4.59       | <b>0.009</b> | -          |              |
| NAT, TRANSP                               | T4 | 1.69       | 0.118        | -          |         | 0.19       | 0.836        | -          |              |

| Between Times |  | $\omega$ -6 PUFA |              | BAFA |              |
|---------------|--|------------------|--------------|------|--------------|
|               |  | t                | P(perm)      | t    | P(perm)      |
| T0, T1        |  | 123.40           | <b>0.006</b> | 2.59 | 0.234        |
| T0, T2        |  | 3.71             | 0.167        | 6.00 | 0.098        |
| T0, T3        |  | 7.35             | <b>0.001</b> | 6.28 | <b>0.001</b> |

|        |      |              |       |              |
|--------|------|--------------|-------|--------------|
| T0, T4 | 4.58 | <b>0.002</b> | 6.36  | <b>0.001</b> |
| T1, T2 | 2.48 | 0.259        | 8.32  | 0.077        |
| T1, T3 | 0.85 | 0.425        | 12.95 | <b>0.001</b> |
| T1, T4 | 2.42 | <b>0.027</b> | 11.18 | <b>0.001</b> |
| T2, T3 | 1.92 | 0.061        | 1.75  | 0.092        |
| T2, T4 | 0.20 | 0.839        | 2.54  | <b>0.020</b> |
| T3, T4 | 1.78 | 0.088        | 1.10  | 0.297        |

| <b>Between treatments</b> | <b>t</b> | <b>P(perm)</b> |
|---------------------------|----------|----------------|
| NAT, TRANSP               | 10.30    | <b>0.004</b>   |

---
